# Supplementary material for: Adjunctive Bright Light Therapy for Bipolar Depression: A Randomized Double-Blind Placebo-Controlled Trial
Source: Atypon-hosted journal article supplement (doi:10.1176/appi.ajp.2017.16101200), 2017-10-03
Supplement: appi.ajp.2017.16101200.ds001.pdf [file appi.ajp.2017.16101200.ds001.pdf]

 


Psychiatry Online
