# Supplementary material for: Adjunctive Bright Light Therapy for Bipolar Depression: A Randomized Double-Blind Placebo-Controlled Trial
Source: Atypon-hosted journal article supplement (doi:10.1176/appi.ajp.2017.16101200), 2017-10-03

Figure (Supplement). Consort Chart.

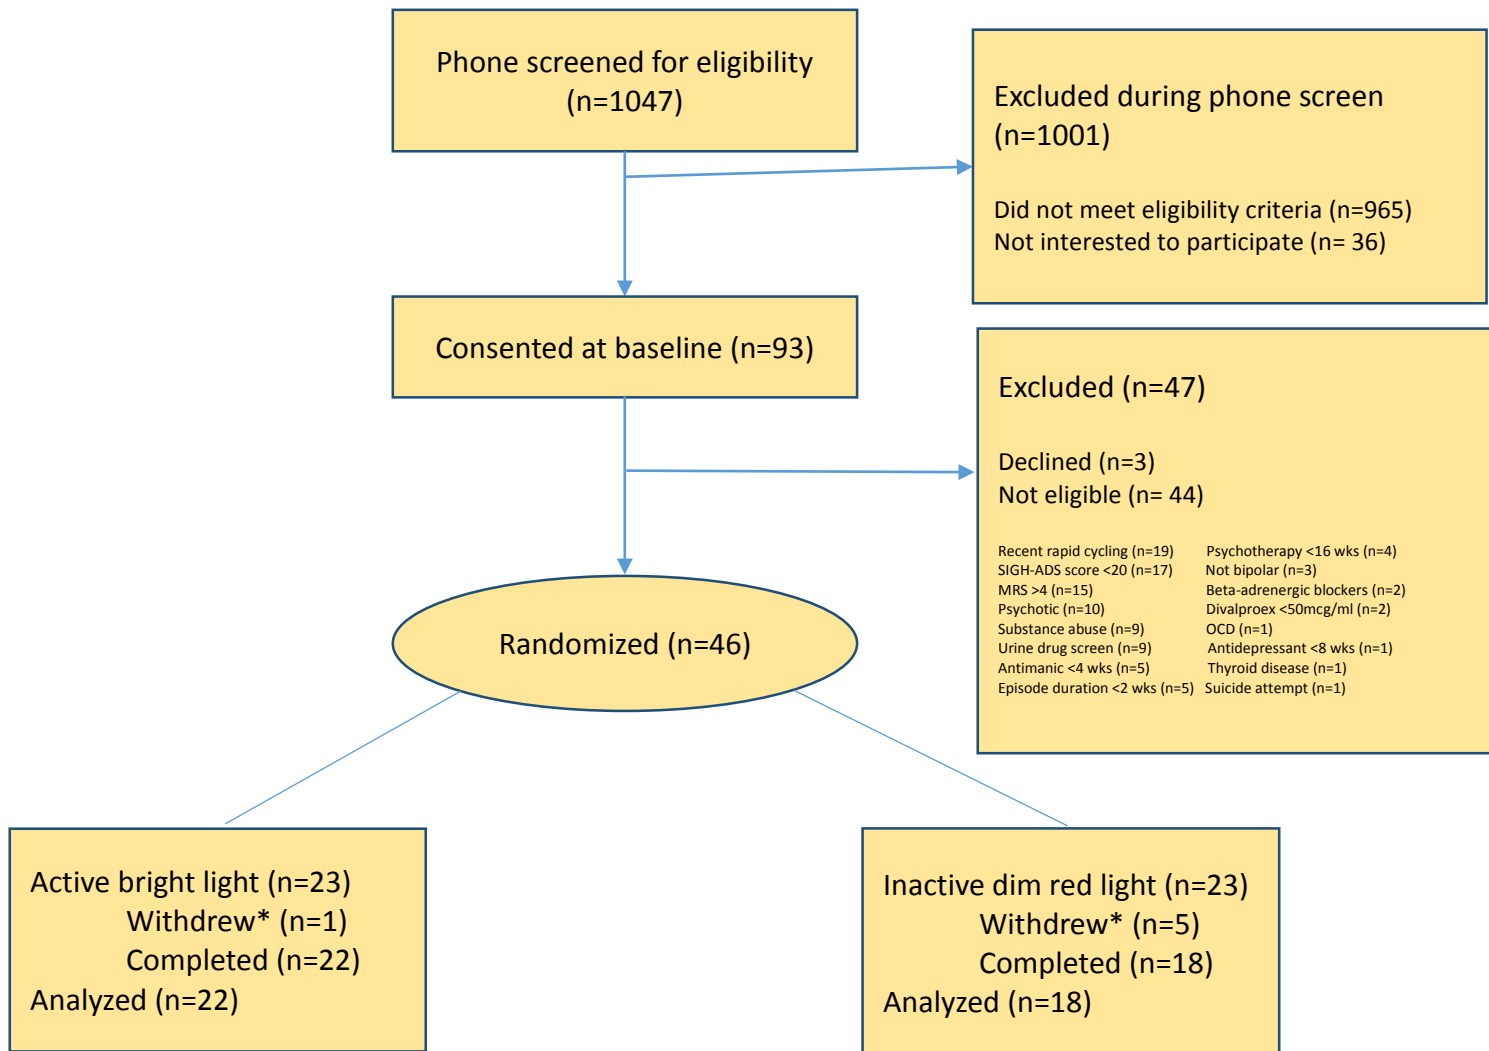

Note: Numbers based on primary outcome (SIGH-ADS).

All retained subjects were included in the analyses at each assessment point.

\*See Results for the reasons for withdrawal.

# DayLight 10000™ Output Spectrum

Biaxial Fluorescent at 3000 and 4000 deg K

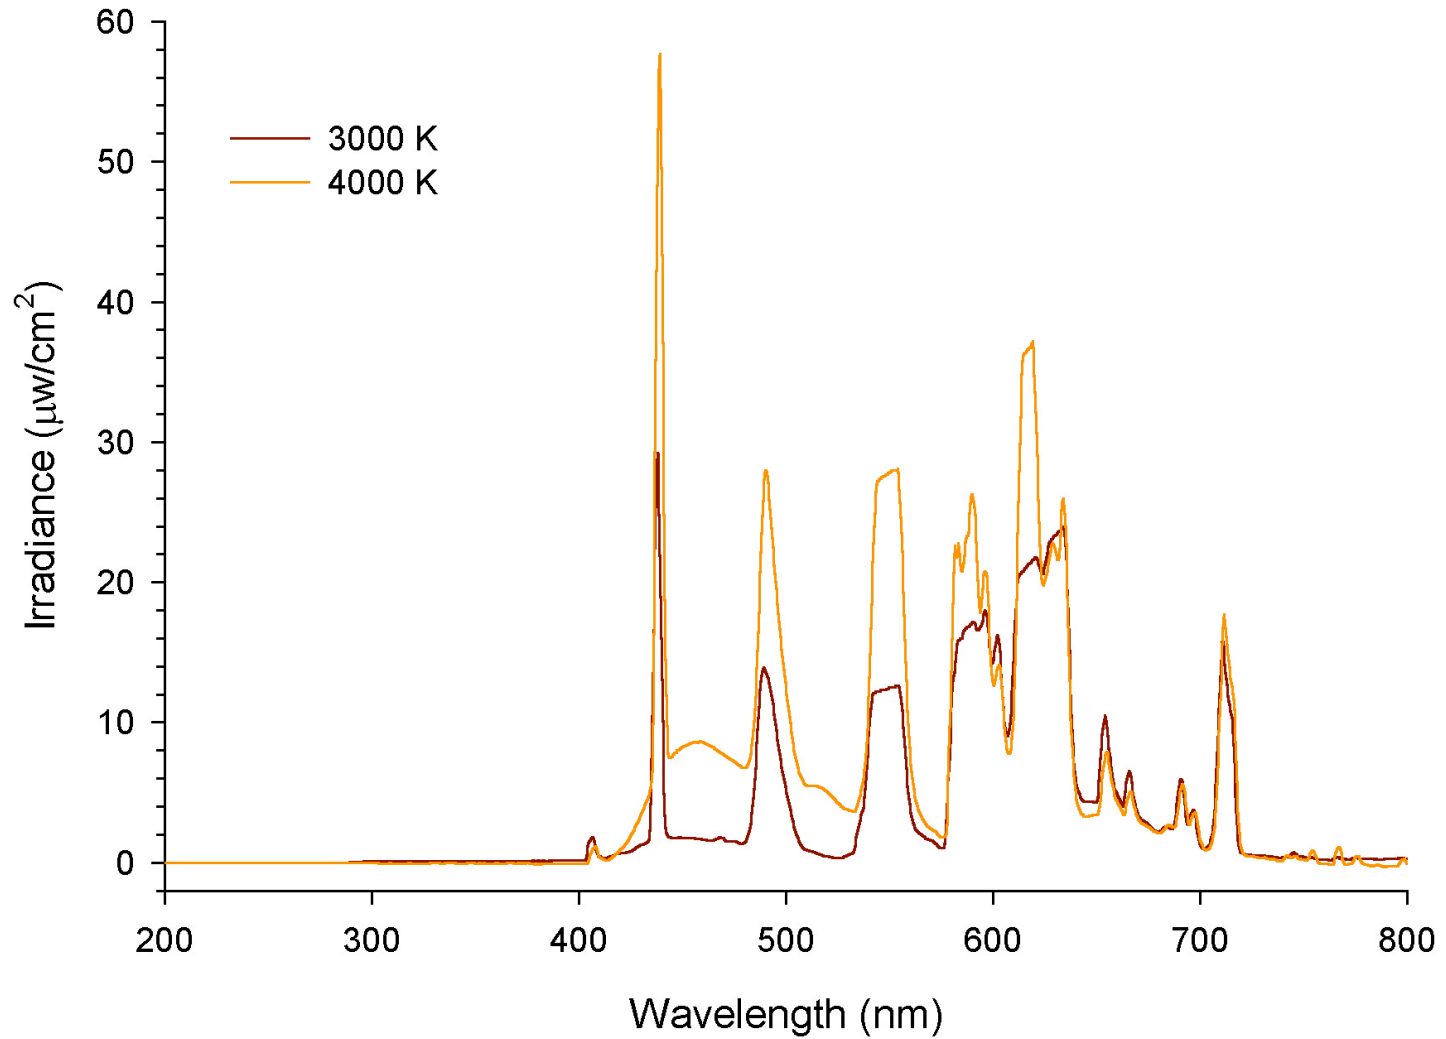

Supplement: appi.ajp.2017.16101200.ds001.pdf [file appi.ajp.2017.16101200.ds001.pdf]
